# Supplementary material for: Inflammatory mediators and dual depression: Potential biomarkers in plasma of primary and substance-induced major depression in cocaine and alcohol use disorders
Source: PubMed Central journal article supplement (PMC6417778; doi:10.1371/journal.pone.0213791), 2019-03-14
Supplement: pone.0213791.s001.pdf [file pone.0213791.s001.pdf]

| CODE | AGE<br>years | BMI<br>kg/m2 | SEX<br>1=male<br>2=female | SUD<br>0=No<br>1=Yes | SUD TYPE<br>0=No<br>1=CUD<br>2=AUD | MDD<br>0=No<br>1=Yes | MDD TYPE<br>0=No<br>1=Primary MDD<br>2=Induced MDD | TNFa<br>pg/mL | IL1b<br>pg/mL | CXCL12<br>pg/mL | CCL2<br>pg/mL | CCL11<br>pg/mL | CX3CL1<br>pg/mL |
|------|--------------|--------------|---------------------------|----------------------|------------------------------------|----------------------|----------------------------------------------------|---------------|---------------|-----------------|---------------|----------------|-----------------|
|      | 25           | 28.7         | 1                         | 0                    | 0                                  | 0                    | 0                                                  | 13.6          | 0.39          | 260.25          | 44.68         | 156.25         | 5.65            |
|      | 36           | 28.9         | 1                         | 0                    | 0                                  | 0                    | 0                                                  | 9.9           | 1.05          | 270.59          | 48.19         | 172.88         | 4.84            |
|      | 38           | 26.5         | 1                         | 0                    | 0                                  | 0                    | 0                                                  | 16            | 0.65          | 227.19          | 60.93         | 141.37         | 5.41            |
|      | 39           | 27.7         | 1                         | 0                    | 0                                  | 0                    | 0                                                  | 9.5           | 0.68          | 303.81          | 82.98         | 392            | 2.94            |
|      | 30           | 22.8         | 2                         | 0                    | 0                                  | 0                    | 0                                                  | 11.9          | 0.62          | 276.31          | 85.35         | 306.19         | 2.96            |
|      | 30           | 24.3         | 2                         | 0                    | 0                                  | 0                    | 0                                                  | 14.4          | 0.45          | 305.29          | 48.51         | 186.86         | 1.43            |
|      | 29           | 19.8         | 1                         | 0                    | 0                                  | 0                    | 0                                                  | 15.2          | 0.92          | 299.9           | 48.37         | 182.77         | 6.52            |
|      | 29           | 28           | 2                         | 0                    | 0                                  | 0                    | 0                                                  | 20.4          | 0.95          | 281.4           | 60.92         | 170.5          | 1.8             |
|      | 42           | 20.4         | 2                         | 0                    | 0                                  | 0                    | 0                                                  | 15.2          | 0.48          | 314.86          | 50.96         | 134.65         | 4.23            |
|      | 32           | 23.8         | 1                         | 0                    | 0                                  | 0                    | 0                                                  | 11.5          | 0.27          | 303.81          | 47.15         | 161.31         | 0.81            |
|      | 41           | 26.4         | 2                         | 0                    | 0                                  | 0                    | 0                                                  | 11.9          | 1.18          | 310.23          | 56.36         | 286.99         | 2.6             |
|      | 31           | 27.2         | 2                         | 0                    | 0                                  | 0                    | 0                                                  | 15.2          | 0.27          | 279.15          | 54.51         | 132.23         | 2.28            |
|      | 37           | 26.4         | 2                         | 0                    | 0                                  | 0                    | 0                                                  | 21.6          | 1.05          | 291.7           | 57.41         | 206.41         | 4.01            |
|      | 29           | 25           | 2                         | 0                    | 0                                  | 0                    | 0                                                  | 10.3          | 0.45          | 252.08          | 37.97         | 143.27         | 2.48            |
|      | 32           | 25.6         | 2                         | 0                    | 0                                  | 0                    | 0                                                  | 6.1           | 0.51          | 302.74          | 39.66         | 107.59         | 2.59            |
|      | 33           | 25.7         | 2                         | 0                    | 0                                  | 0                    | 0                                                  | 20            | 0.51          | 307.83          | 57.93         | 193.61         | 3.13            |
|      | 34           | 26.6         | 2                         | 0                    | 0                                  | 0                    | 0                                                  | 7             | 0.48          | 253.58          | 48.07         | 151.02         | 3.07            |
|      | 23           | 23           | 1                         | 0                    | 0                                  | 0                    | 0                                                  | 17.2          | 0.51          | 288.66          | 37.86         | 140.34         | 3.46            |
|      | 33           | 20.9         | 1                         | 0                    | 0                                  | 0                    | 0                                                  | 13.6          | 0.79          | 300.71          | 67.37         | 195.19         | 6.87            |
|      | 33           | 24.3         | 1                         | 0                    | 0                                  | 0                    | 0                                                  | 5.3           | 3.93          | 281.82          | 57.81         | 174.04         | 4.24            |
|      | 36           | 22.5         | 1                         | 0                    | 0                                  | 0                    | 0                                                  | 12.7          | 0.73          | 348.96          | 44.99         | 87.67          | 3.51            |
|      | 35           | 21.6         | 1                         | 0                    | 0                                  | 0                    | 0                                                  | 18            | 0.62          | 275.74          | 40.63         | 174.65         | 3.2             |
|      | 34           | 20.06        | 2                         | 0                    | 0                                  | 0                    | 0                                                  | 6.5           | 0.69          | 203.59          | 17.63         | 126.69         | 3.63            |
|      | 33           | 23.05        | 1                         | 0                    | 0                                  | 0                    | 0                                                  | 5             | 4.75          | 396.22          | 15.01         | 174.82         | 3.01            |
|      | 43           | 25.71        | 1                         | 0                    | 0                                  | 0                    | 0                                                  | 16.8          | 0.51          | 323.46          | 28.85         | 205.75         | 2.31            |
|      | 35           | 24.39        | 1                         | 0                    | 0                                  | 0                    | 0                                                  | 9.2           | 0.6           | 251.78          | 21.89         | 178.7          | 0.87            |
|      | 30           | 30.12        | 2                         | 0                    | 0                                  | 0                    | 0                                                  | 18.4          | 0.82          | 284.85          | 42.72         | 121.48         | 2.46            |
|      | 30           | 21.77        | 2                         | 0                    | 0                                  | 0                    | 0                                                  |               |               | 293.34          | 22.18         | 36.33          | 2.02            |
|      | 38           | 25.68        | 1                         | 0                    | 0                                  | 0                    | 0                                                  | 1.6           | 0.65          | 219.61          | 26.34         | 95.09          | 1.35            |
|      | 37           | 24.8         | 1                         | 0                    | 0                                  | 0                    | 0                                                  | 5             | 0.86          | 265.49          | 29.51         | 114.3          | 1.45            |
|      | 37           | 27.78        | 1                         | 0                    | 0                                  | 0                    | 0                                                  | 5             | 0.86          | 270.15          | 23.64         | 71.5           | 1.56            |
|      | 39           | 21.04        | 1                         | 0                    | 0                                  | 0                    | 0                                                  | 16.1          | 1.11          | 335.87          | 14.99         | 193.65         | 1.45            |

|    |       |   |   |   |   |   |      |      |        |       |        |      |
|----|-------|---|---|---|---|---|------|------|--------|-------|--------|------|
| 43 | 23.89 | 1 | 0 | 0 | 0 | 0 | 13   | 0.23 | 267.82 | 20.3  | 106.87 | 1.44 |
| 38 | 27.13 | 1 | 0 | 0 | 0 | 0 | 4.5  |      | 249.74 | 16.73 | 118.13 | 2.03 |
| 38 | 29.32 | 1 | 0 | 0 | 0 | 0 | 3.5  |      | 248.34 | 22.87 | 114.11 | 0.67 |
| 28 | 22.09 | 1 | 0 | 0 | 0 | 0 | 9.4  | 0.56 | 250.06 | 30.24 | 203.24 | 2.96 |
| 37 | 26.83 | 1 | 0 | 0 | 0 | 0 | 3.5  |      | 214.35 | 21.62 | 65.71  | 1.61 |
| 27 | 23.6  | 1 | 0 | 0 | 0 | 0 | 13.6 | 0.3  | 296.43 | 29.15 | 184.54 | 3.16 |
| 28 | 20.6  | 2 | 0 | 0 | 0 | 0 | 19.9 | 0.49 | 246.91 | 28.9  | 64.27  | 4.4  |
| 30 | 26.23 | 1 | 0 | 0 | 0 | 0 | 10.2 | 0.49 | 329.6  | 28.33 | 108.55 | 3.85 |
| 27 | 24.3  | 1 | 0 | 0 | 0 | 0 | 11.6 | 0.38 | 287.36 | 19.77 | 109.18 | 1.88 |
| 39 | 27.76 | 1 | 0 | 0 | 0 | 0 | 12   | 0.57 | 251.01 | 38.64 | 185.2  | 1.21 |
| 30 | 24.05 | 1 | 0 | 0 | 0 | 0 | 7.7  | 0.08 | 292.88 | 27.91 | 132.92 | 1.22 |
| 42 | 20.53 | 1 | 0 | 0 | 0 | 0 | 10.7 | 0    | 327.53 | 30.46 | 148.3  | 1.7  |
| 40 | 34.34 | 1 | 0 | 0 | 0 | 0 | 15   | 0.81 | 350.82 | 26.26 | 104.9  | 2.38 |
| 39 | 29.71 | 1 | 0 | 0 | 0 | 0 | 5.9  | 0    | 328.32 | 23.28 | 104.36 | 0.24 |
| 35 | 26.04 | 2 | 0 | 0 | 0 | 0 | 12.9 | 1.41 | 263.74 | 30.09 | 269.74 | 2.57 |
| 48 | 29.39 | 2 | 0 | 0 | 0 | 0 | 5.2  | 0.66 | 236.38 | 30.8  | 145.96 | 2.86 |
| 25 | 23.44 | 2 | 0 | 0 | 0 | 0 | 12.2 | 0.32 | 254.99 | 31.01 | 67.89  | 1.74 |
| 22 | 22.92 | 1 | 0 | 0 | 0 | 0 | 7    | 0.61 | 293.08 | 24.82 | 149.73 | 2.02 |
| 43 | 19.72 | 2 | 0 | 0 | 0 | 0 | 11.6 | 0.3  | 211.87 | 27.81 | 205.68 | 2.35 |
| 49 | 19.82 | 2 | 0 | 0 | 0 | 0 | 12.3 | 0.53 | 264.24 | 21.16 | 81     | 2.15 |
| 40 | 23.73 | 2 | 0 | 0 | 0 | 0 | 9.8  | 0.98 | 248.61 | 20.51 | 156.16 | 1.52 |
| 25 | 37.04 | 2 | 0 | 0 | 0 | 0 | 6.8  | 0.34 | 260.07 | 22.32 | 98.69  | 0.52 |
| 24 | 21.91 | 1 | 0 | 0 | 0 | 0 | 8    | 0.1  | 373.02 | 12.75 | 152.28 | 1.85 |
| 35 | 22.86 | 2 | 0 | 0 | 0 | 0 | 10.5 | 0.7  | 351.61 | 19.18 | 123.67 | 2.87 |
| 40 | 21.97 | 2 | 0 | 0 | 0 | 0 | 20.7 | 1    | 286.97 | 27.42 | 122.31 | 1.79 |
| 37 | 29.76 | 2 | 0 | 0 | 0 | 0 | 7.9  | 0.28 | 311.68 | 24.03 | 105.73 | 2.12 |
| 42 | 25.33 | 2 | 0 | 0 | 0 | 0 | 17   | 1.28 | 277.89 | 21.47 | 124.74 | 3.34 |
| 44 | 20.32 | 2 | 0 | 0 | 0 | 0 | 12.7 | 0.45 | 441.97 | 30.08 | 175.81 | 1.21 |
| 44 | 25.51 | 2 | 0 | 0 | 0 | 0 | 5.2  | 0.4  | 358.04 | 36.24 | 83.67  | 3.45 |
| 37 | 22.43 | 2 | 0 | 0 | 0 | 0 | 10   | 0.4  | 249.31 | 22.71 | 77.67  | 2.31 |
| 35 | 20.7  | 2 | 1 | 1 | 1 | 2 | 8.6  | 0.68 | 270.73 | 34.29 | 177.6  | 2.33 |
| 23 | 19.5  | 1 | 1 | 1 | 1 | 2 | 7.4  | 0.62 | 237.27 | 57.88 | 190.37 | 3.94 |
| 26 | 27.8  | 2 | 1 | 1 | 1 | 2 | 1.9  | 1.09 | 207.93 | 32.36 | 113.84 | 3.36 |
| 44 | 24.8  | 2 | 1 | 1 | 1 | 2 | 10.4 | 0.63 | 196.13 | 45.13 | 115.7  | 3.44 |
| 35 | 26.3  | 1 | 1 | 1 | 1 | 2 | 4.4  | 0.59 | 264.59 | 45.8  | 138.88 | 2.51 |

|    |       |   |   |   |   |   |      |      |        |       |        |      |
|----|-------|---|---|---|---|---|------|------|--------|-------|--------|------|
| 31 | 24.1  | 2 | 1 | 1 | 1 | 2 | 6.3  | 0.53 | 188.18 | 55.71 | 96.32  | 4.28 |
| 48 | 24.9  | 1 | 1 | 1 | 1 | 2 | 8.3  | 1.03 | 186.35 | 42.9  | 73.7   | 1.12 |
| 59 | 29.9  | 1 | 1 | 1 | 1 | 2 | 4.7  | 0.89 | 195.48 | 35.54 | 146.07 | 3.72 |
| 39 | 33.6  | 1 | 1 | 1 | 1 | 2 | 12.3 | 0.56 | 234.83 | 49.96 | 148.79 | 0.08 |
| 32 | 34.34 | 1 | 1 | 1 | 1 | 2 | 7.4  |      | 273.94 | 52.37 | 91.57  | 0.9  |
| 31 | 28.38 | 1 | 1 | 1 | 1 | 2 | 12.8 |      | 256.51 | 39.38 | 99.24  |      |
| 27 | 21.86 | 1 | 1 | 1 | 1 | 2 |      |      | 252.43 | 17.91 | 51.34  |      |
| 31 | 27.17 | 1 | 1 | 1 | 1 | 2 | 2.7  | 0.97 | 292.14 | 27.33 | 79.83  | 0.73 |
| 33 | 24.22 | 1 | 1 | 1 | 1 | 2 | 8.7  |      | 243.67 | 45.8  | 101.35 | 3.25 |
| 41 | 24.9  | 1 | 1 | 1 | 1 | 2 | 8.4  | 0.77 | 253.47 | 31.3  | 239.98 | 2.04 |
| 45 | 28.4  | 2 | 1 | 1 | 1 | 1 | 20   | 0.48 | 272.89 | 46.6  | 174.22 | 2.94 |
| 45 | 21.48 | 1 | 1 | 1 | 1 | 1 | 18.4 | 0.68 | 271.31 | 66.84 | 285.25 | 4.89 |
| 46 | 34.2  | 2 | 1 | 1 | 1 | 1 | 6    | 0.62 | 269.58 | 37.09 | 122.72 | 2.85 |
| 55 | 33.75 | 2 | 1 | 1 | 1 | 1 | 8.6  | 0.1  | 215.37 | 41.52 | 71.64  | 2.53 |
| 35 | 31.82 | 1 | 1 | 1 | 1 | 1 | 8    | 0.45 | 281.96 | 33.45 | 92.66  | 1.25 |
| 24 | 31.3  | 2 | 1 | 1 | 1 | 1 | 13.2 | 0.13 | 283.09 | 57.88 | 133.24 | 3.71 |
| 42 | 23    | 2 | 1 | 1 | 1 | 1 | 8.2  | 0.89 | 336.68 | 72.89 | 265.15 | 1.62 |
| 51 | 25.6  | 2 | 1 | 1 | 1 | 1 | 11.1 | 0.79 | 263.19 | 62.13 | 464.98 | 1.77 |
| 39 | 26.6  | 2 | 1 | 1 | 1 | 1 | 15.2 | 0.7  | 292.25 | 50.38 | 169.62 | 1.73 |
| 47 | 27.5  | 2 | 1 | 1 | 1 | 1 | 8.6  | 0.68 | 300.44 | 47.31 | 396.39 | 3.95 |
| 37 | 23.5  | 2 | 1 | 1 | 1 | 1 | 5.3  | 0.84 | 216.36 | 36.91 | 287.32 | 0.57 |
| 56 | 40.9  | 2 | 1 | 1 | 1 | 1 | 7    | 0.81 | 244.51 | 59.48 | 244.85 | 3.36 |
| 49 | 21.6  | 1 | 1 | 1 | 1 | 1 | 15.6 | 0.36 | 235.87 | 45.05 | 297.15 | 1.77 |
| 42 | 23.5  | 2 | 1 | 1 | 1 | 1 | 26.3 | 0.89 | 295.68 | 36.16 | 254.43 | 0.63 |
| 42 | 24.92 | 2 | 1 | 1 | 1 | 1 | 0.1  | 0.64 | 237.76 | 41.33 | 172.24 | 2.42 |
| 22 | 18.66 | 2 | 1 | 1 | 1 | 1 | 16.3 | 1.83 | 313.61 | 18.24 | 48.3   | 1.34 |
| 23 | 21.22 | 1 | 1 | 1 | 1 | 1 | 15   |      | 292.5  | 35.7  | 116.85 | 2.58 |
| 36 | 22.53 | 1 | 1 | 1 | 1 | 1 | 6.5  | 0.33 | 155.39 | 28.27 | 213.55 | 0.98 |
| 29 | 25.2  | 2 | 1 | 1 | 0 | 0 | 15   | 1.37 | 311.38 | 41.93 | 69.85  | 4.63 |
| 41 | 23.2  | 1 | 1 | 1 | 0 | 0 | 6.1  | 1.43 | 260.77 | 46.97 | 142.76 | 0.98 |
| 25 | 22.5  | 1 | 1 | 1 | 0 | 0 | 3.3  | 0.92 | 248.13 | 64.97 | 145.06 | 0.95 |
| 34 | 22.8  | 1 | 1 | 1 | 0 | 0 | 6.5  | 1    | 268.79 | 44.91 | 96.95  | 3.65 |
| 26 | 22.7  | 1 | 1 | 1 | 0 | 0 | 6.1  | 0.81 | 262.04 | 47.97 | 152.65 | 2.48 |
| 39 | 25.9  | 1 | 1 | 1 | 0 | 0 | 5.8  | 1.14 | 258.47 | 57.59 | 147.74 | 3.36 |
| 41 | 31.7  | 2 | 1 | 1 | 0 | 0 | 8.6  | 1.19 | 187.14 | 27.54 | 41.94  | 2.21 |

|    |       |   |   |   |   |   |      |      |        |       |        |      |
|----|-------|---|---|---|---|---|------|------|--------|-------|--------|------|
| 43 | 26.2  | 1 | 1 | 1 | 0 | 0 | 8.3  | 0.75 | 288.51 | 35.28 | 67.71  | 2.64 |
| 32 | 20.3  | 1 | 1 | 1 | 0 | 0 | 3.7  | 1.03 | 241.23 | 43.69 | 237.23 | 0.29 |
| 43 | 23.3  | 1 | 1 | 1 | 0 | 0 | 8.3  | 1.72 | 249.28 | 41.31 | 120.05 | 2.14 |
| 46 | 30.67 | 1 | 1 | 1 | 0 | 0 | 2    | 0.97 | 261.46 | 39.15 | 80.81  | 1.5  |
| 40 | 25.03 | 1 | 1 | 1 | 0 | 0 | 12.5 | 2.45 | 161.5  | 17.44 | 72.47  | 0.34 |
| 38 | 25.08 | 1 | 1 | 1 | 0 | 0 | 7.8  | 2.78 | 248.46 | 37.92 | 124.75 | 1.63 |
| 29 | 24.38 | 1 | 1 | 1 | 0 | 0 | 20   | 4.07 | 322.98 | 37.38 | 135.44 | 2.84 |
| 25 | 25.04 | 2 | 1 | 1 | 0 | 0 | 7.8  |      | 332.76 | 51.8  | 93.58  | 3.81 |
| 37 | 28.06 | 1 | 1 | 1 | 0 | 0 | 23.5 | 2.26 | 323.93 | 27.01 | 181.76 | 1.86 |
| 39 | 28.08 | 1 | 1 | 1 | 0 | 0 | 8    | 0.97 | 371.06 | 32.21 | 86.18  | 0.32 |
| 35 | 22.79 | 1 | 1 | 1 | 0 | 0 | 11.4 |      | 400.22 | 45.26 | 123.04 | 3.09 |
| 38 | 26.25 | 1 | 1 | 1 | 0 | 0 | 8.7  |      | 365.95 | 32.4  | 95.59  | 0.53 |
| 37 | 18.73 | 2 | 1 | 1 | 0 | 0 | 4.9  | 0.79 | 338.58 | 32.73 | 44.68  | 1.99 |
| 38 | 28.34 | 1 | 1 | 1 | 0 | 0 | 12.5 | 1.02 | 235.93 | 26.89 | 251.46 | 2.31 |
| 38 | 22.65 | 1 | 1 | 1 | 0 | 0 | 0.1  | 1.02 | 388.97 | 30.97 | 81.5   | 1.45 |
| 36 | 23.12 | 1 | 1 | 1 | 0 | 0 | 4.4  | 1.83 | 303.67 | 34.94 | 145.24 | 1.09 |
| 43 | 25.22 | 1 | 1 | 1 | 0 | 0 | 12.3 |      | 245.17 | 39.5  | 140.22 | 1.04 |
| 24 | 27.45 | 1 | 1 | 1 | 0 | 0 | 4    | 0.13 | 218.34 | 34.89 | 221.65 | 1.06 |
| 43 | 21.33 | 2 | 1 | 1 | 0 | 0 | 6.5  | 0.13 | 231.98 | 35.97 | 177.72 |      |
| 27 | 19.95 | 1 | 1 | 1 | 0 | 0 | 5.2  |      | 287.85 | 36.46 | 118.1  | 2.56 |
| 45 | 25.14 | 1 | 1 | 1 | 0 | 0 | 11.1 | 1.78 | 345.42 | 35.4  | 148.43 | 2.75 |
| 43 | 27.72 | 1 | 1 | 1 | 0 | 0 | 0.1  | 0.75 | 279.2  | 39.45 | 175.83 | 1.51 |
| 43 | 24.69 | 1 | 1 | 1 | 0 | 0 | 6.9  |      | 403.29 | 39.85 | 154.91 | 0.79 |
| 35 | 20.31 | 2 | 1 | 1 | 0 | 0 | 6.5  |      | 283.32 | 39.84 | 45.38  | 3.81 |
| 42 | 30.6  | 1 | 1 | 2 | 1 | 1 | 9.7  | 1.19 | 211.04 | 50.79 | 145.22 | 1.41 |
| 58 | 30.1  | 1 | 1 | 2 | 1 | 1 | 4    | 1.89 | 239.06 | 45.14 | 202.61 | 2.8  |
| 45 | 28.7  | 2 | 1 | 2 | 1 | 1 | 5.1  | 1.09 | 237.65 | 51.36 | 140.54 | 5.29 |
| 52 | 31    | 1 | 1 | 2 | 1 | 1 | 5.4  | 0.43 | 273.25 | 47.83 | 155.76 | 1.27 |
| 44 | 26.2  | 2 | 1 | 2 | 1 | 1 | 8.8  | 0.1  | 360.77 | 23.53 | 68.12  | 0.92 |
| 48 | 31.7  | 1 | 1 | 2 | 1 | 1 | 5.8  | 0.75 | 281.13 | 30.93 | 133.69 | 2.91 |
| 40 | 28.1  | 2 | 1 | 2 | 1 | 2 | 4.4  | 0.35 | 155.55 | 28.98 | 127.72 | 3.36 |
| 41 | 25.4  | 2 | 1 | 2 | 1 | 2 | 4.4  | 0.63 | 183.21 | 61.72 | 130.7  | 3.37 |
| 46 | 28.1  | 1 | 1 | 2 | 1 | 2 | 7.2  | 1.14 | 191.97 | 40.86 | 26.95  | 3.38 |
| 38 | 31.4  | 1 | 1 | 2 | 1 | 2 | 5.9  | 0.69 | 191.05 | 31.57 | 97.76  | 3.74 |
| 34 | 21.2  | 1 | 1 | 2 | 1 | 2 | 1    | 1.48 | 226.75 | 41.8  | 133.95 | 5.48 |

|    |       |   |   |   |   |   |       |      |        |       |        |      |
|----|-------|---|---|---|---|---|-------|------|--------|-------|--------|------|
| 51 | 21.8  | 1 | 1 | 2 | 1 | 2 | 6.3   | 0.75 | 237.65 | 38.21 | 77.74  | 2.49 |
| 53 | 22    | 2 | 1 | 2 | 1 | 2 | 1.9   | 0.24 | 246.73 | 49.42 | 128.42 | 2.37 |
| 45 | 27    | 1 | 1 | 2 | 0 | 0 | 0.5   | 0.43 | 193.01 | 39.7  | 133.02 | 2.29 |
| 45 | 23.6  | 1 | 1 | 2 | 0 | 0 | 6.1   | 0.19 | 217.49 | 31.12 | 187.68 | 1.76 |
| 39 | 25.4  | 1 | 1 | 2 | 0 | 0 | 14.8  | 1.98 | 223.15 | 53.84 | 125.97 | 2.78 |
| 53 | 29.3  | 2 | 1 | 2 | 0 | 0 | 6.1   | 0.1  | 253.88 | 43.9  | 80.93  | 2.91 |
| 37 | 27.3  | 1 | 1 | 2 | 0 | 0 | 7.5   | 0.5  | 236.5  | 45.39 | 157.34 | 0.28 |
| 51 | 25.9  | 1 | 1 | 2 | 0 | 0 | 7.5   | 1.14 | 222.12 | 56.68 | 138.13 | 5.64 |
| 43 | 27.7  | 1 | 1 | 2 | 0 | 0 | 3     | 0.63 | 234.96 | 48.06 | 201.17 | 2.55 |
| 41 | 25.8  | 1 | 1 | 2 | 0 | 0 | 9     | 0.56 | 238.03 | 31.59 | 111.09 | 0.82 |
| 42 | 19.38 | 2 | 1 | 2 | 0 | 0 | 6.61  | 1.84 | 157.78 | 30.43 | 77.39  | 1.34 |
| 46 | 25.5  | 1 | 1 | 2 | 1 | 2 | 6.94  | 1.22 | 167.54 | 31.84 | 144.42 | 0.89 |
| 49 | 20.7  | 2 | 1 | 2 | 1 | 2 | 15.4  | 5.31 | 196.05 | 34.11 | 80.74  | 3.86 |
| 61 | 19.03 | 2 | 1 | 2 | 1 | 2 | 15.22 | 2.81 | 152.83 | 29.78 | 76.04  | 2.05 |
| 56 | 20.37 | 1 | 1 | 2 | 1 | 2 | 7.41  | 1.12 | 141.76 | 10.84 | 121.11 | 0.81 |
| 60 | 27.5  | 1 | 1 | 2 | 1 | 2 | 12.2  | 2.42 | 784.53 | 13.97 | 142.47 | 1.76 |
| 49 | 34.7  | 1 | 1 | 2 | 1 | 1 | 10.49 | 1.94 | 259.68 | 17.89 | 117.59 | 1.66 |
| 41 | 26.67 | 1 | 1 | 2 | 0 | 0 | 10.49 | 3.22 | 184.14 | 29.24 | 75.36  | 2.34 |
| 61 | 22    | 1 | 1 | 2 | 1 | 1 | 3.14  | 0.81 | 191.52 | 12.43 | 131.1  | 1.07 |
| 45 | 28.91 | 1 | 1 | 2 | 1 | 1 | 12.46 | 1.88 | 226.86 | 27.78 | 126.88 | 1.93 |
| 38 | 25.28 | 2 | 1 | 2 | 1 | 2 | 15.51 | 3.16 | 238.95 | 29.53 | 107.34 | 2.3  |
| 49 | 33.77 | 2 | 1 | 2 | 1 | 1 | 10.78 | 1.83 | 203.21 | 16.61 | 56.05  | 1.46 |
| 51 | 26.8  | 1 | 1 | 2 | 0 | 0 | 10.2  | 2.19 | 214.14 | 29.18 | 104.36 | 1.59 |
| 45 | 20.08 | 1 | 1 | 2 | 1 | 1 | 12.82 | 1.82 | 198.93 | 34.27 | 102.78 | 1.2  |
| 59 | 29.01 | 2 | 1 | 2 | 1 | 2 | 5.21  | 0.93 | 138.42 | 28.17 | 127.13 | 0.68 |
| 37 | 18.9  | 1 | 1 | 2 | 1 | 1 | 11.58 | 1.59 | 199.67 | 21.44 | 56.68  | 1.28 |
| 44 | 24.77 | 1 | 1 | 2 | 1 | 1 | 12.82 | 1.69 | 414.24 | 22.93 | 108.27 | 4.06 |
| 47 | 23.15 | 2 | 1 | 2 | 1 | 2 | 13.55 | 2.2  | 197.32 | 22.02 | 60.44  | 1.6  |
| 49 | 28.08 | 1 | 1 | 2 | 1 | 2 | 8.99  | 1.45 | 197.44 | 31.99 | 100.98 | 1.05 |
| 33 | 26.03 | 1 | 1 | 2 | 1 | 2 | 9.03  | 3.98 | 310.52 | 54.28 | 108.66 | 2.89 |
| 47 | 23.23 | 2 | 1 | 2 | 1 | 2 | 14.2  | 4.42 | 387.27 | 87.12 | 66.61  | 3.21 |
| 42 | 31.14 | 1 | 1 | 2 | 0 | 0 | 8.81  | 1.2  | 144.93 | 20.3  | 119.9  | 0.88 |
| 58 | 25.1  | 1 | 1 | 2 | 0 | 0 | 10.93 | 1.36 | 193.1  | 41.36 | 136.03 | 0.99 |
| 31 | 25.15 | 1 | 1 | 2 | 1 | 2 | 10.56 | 1.5  | 176.08 | 19.16 | 118.26 | 1.09 |
| 51 | 25.3  | 2 | 1 | 2 | 1 | 1 | 7.93  | 1.18 | 172.79 | 15.32 | 88.45  | 0.97 |

|    |       |   |   |   |   |   |       |      |        |       |        |      |
|----|-------|---|---|---|---|---|-------|------|--------|-------|--------|------|
| 42 | 29.14 | 2 | 1 | 2 | 0 | 0 | 10.18 | 1.92 | 159.44 | 13.59 | 135.24 | 1.4  |
| 49 | 33.06 | 2 | 1 | 2 | 0 | 0 | 13.21 | 1.55 | 228.64 | 44.25 | 113.54 | 1.13 |
| 60 | 23.05 | 1 | 1 | 2 | 0 | 0 | 7.27  | 1.27 | 225    | 78.14 | 155.17 | 0.93 |
| 48 | 31.18 | 1 | 1 | 2 | 0 | 0 | 14.24 | 1.63 | 333.06 | 52.53 | 141.21 | 1.18 |
| 43 | 27.97 | 2 | 1 | 2 | 1 | 1 | 8.21  | 0.58 | 196.53 | 28.29 | 78.68  | 1.11 |
| 51 | 25.01 | 2 | 1 | 2 | 0 | 0 | 17.35 | 2.2  | 236.37 | 31.08 | 172.17 | 1.6  |
| 58 | 27.12 | 2 | 1 | 2 | 0 | 0 | 6.46  | 1.45 | 232.17 | 31.68 | 104.67 | 1.06 |
| 39 | 29.05 | 1 | 1 | 2 | 0 | 0 | 5.25  | 1.84 | 325.67 | 19.62 | 83.86  | 1.34 |
| 44 | 19.81 | 1 | 1 | 2 | 0 | 0 | 10.85 | 2.85 | 363.91 | 50.83 | 120.15 | 2.08 |
| 52 | 19.32 | 1 | 1 | 2 | 0 | 0 | 10.58 | 4.73 | 269.49 | 54.15 | 120.14 | 3.44 |
| 34 | 20.83 | 1 | 1 | 2 | 0 | 0 | 28.55 | 4.39 | 536.22 | 76.5  | 97.07  | 3.19 |
| 48 | 29.6  | 1 | 1 | 2 | 0 | 0 | 21.89 | 1.52 | 208.35 | 27.5  | 109.4  | 1.11 |
| 44 | 28.31 | 1 | 1 | 2 | 1 | 1 | 24.91 | 2.71 | 313.28 | 48.88 | 134.17 | 4.49 |
| 48 | 32.6  | 1 | 1 | 2 | 1 | 2 | 19.23 | 1.8  | 219.96 | 48.19 | 132.28 | 1.31 |
| 43 | 26.49 | 2 | 1 | 2 | 1 | 2 | 13.26 | 2.09 | 251.13 | 60.85 | 159.56 | 1.52 |
| 56 | 24.91 | 1 | 1 | 2 | 1 | 2 | 15.49 | 1.37 | 217.46 | 35.84 | 136.17 | 0.99 |
| 51 | 21.01 | 2 | 1 | 2 | 0 | 0 | 11.53 | 2.61 | 205.61 | 28.66 | 105.99 | 1.9  |
| 45 | 21.89 | 1 | 1 | 2 | 0 | 0 | 10.29 | 2.13 | 253.64 | 20.59 | 146.05 | 1.55 |
| 54 | 20.82 | 1 | 1 | 2 | 0 | 0 | 7.99  | 2.18 | 191.73 | 23.4  | 225.52 | 1.58 |
